# Supplementary material for: Heterogeneous activation of peroxymonosulfate for bisphenol AF degradation with BiOI0.5Cl0.5
Source: Royal Society of Chemistry journal article supplement (doi:10.1039/c9ra01687b), 2019-01-01
Supplement: c9ra01687b1.pdf [file c9ra01687b1.pdf]

## Supplementary material

### **Heterogeneous activation of peroxymonosulfate for bisphenol AF degradation with $\text{BiOI}_{0.5}\text{Cl}_{0.5}$**

Weihong Tang <sup>a</sup>, Yongli Zhang <sup>a,\*</sup>, Hongguang Guo <sup>a,b</sup>, Yang Liu <sup>a</sup>

<sup>a</sup> *College of Architecture and Environment, Sichuan University, Chengdu 610065, China*

<sup>b</sup> *Department of Civil & Environmental Engineering, University of Washington, Box 352700, Seattle, WA 98195-2700, United States*

\*Corresponding author. Tel: +86-028-85408889; fax: +86-028-85405534

Email: xyl\_scu@126.com (Yongli Zhang)

### **9 Figures**

**Fig. S1**

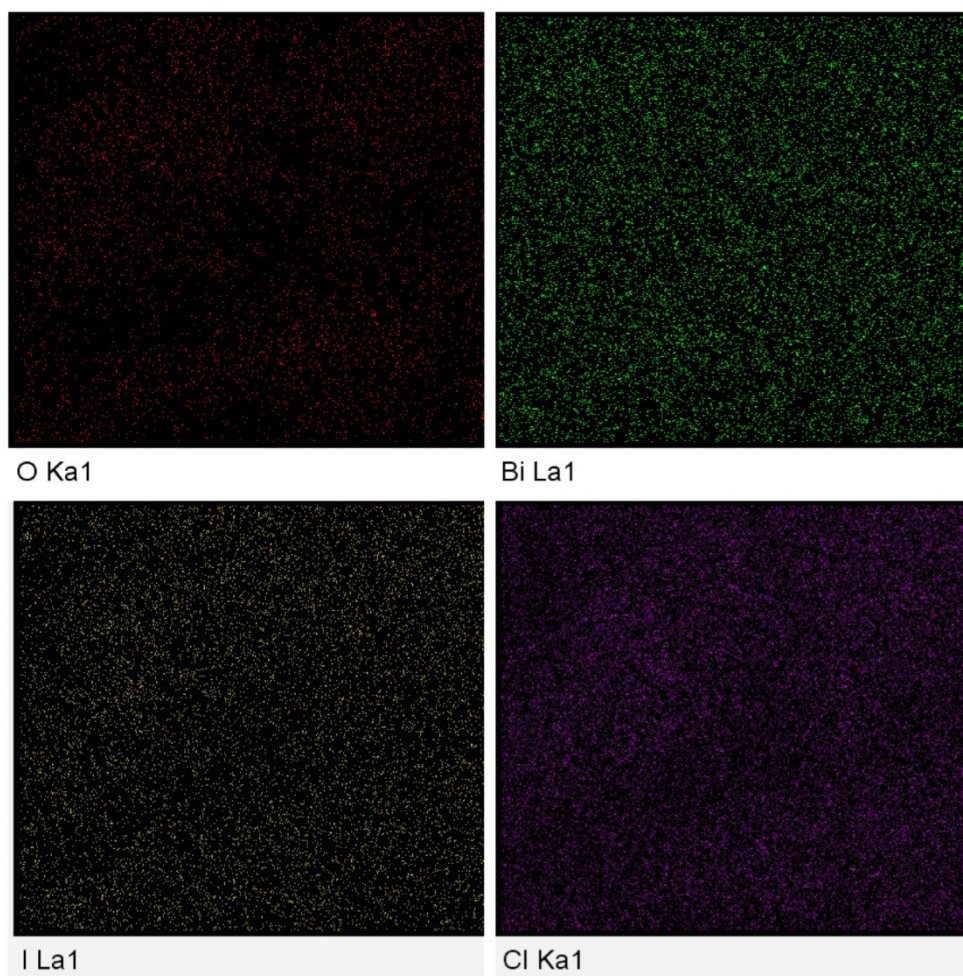

**Fig. S1** EDX mappings of the  $\text{BiOI}_{0.5}\text{Cl}_{0.5}$

Fig. S2

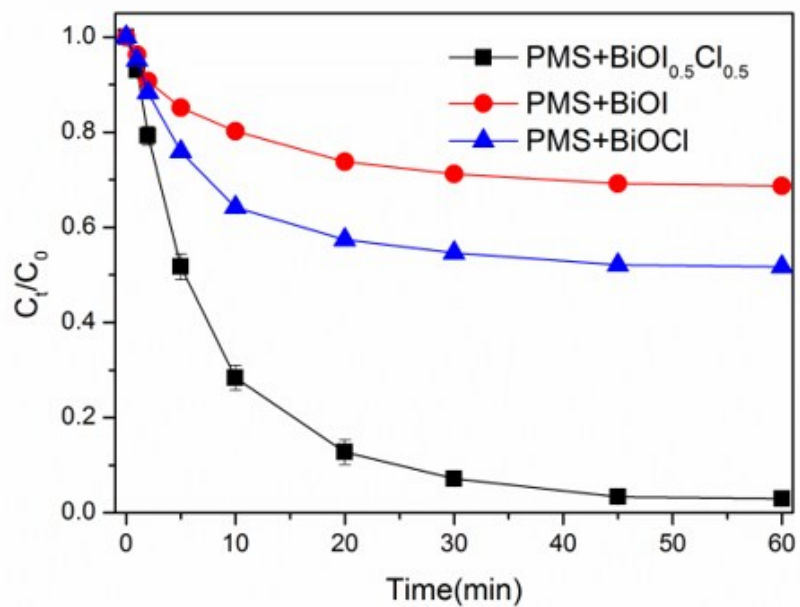

Fig. S2 Removal of BPAF in different reaction systems: PMS/BiOI<sub>0.5</sub>Cl<sub>0.5</sub>, PMS/ BiOI and PMS/ BiOCl ([BPAF]=10 mg/L, PMS/BPAF=5/1, catalyst dosage=0.5 g/L, T=298K).

Fig. S3

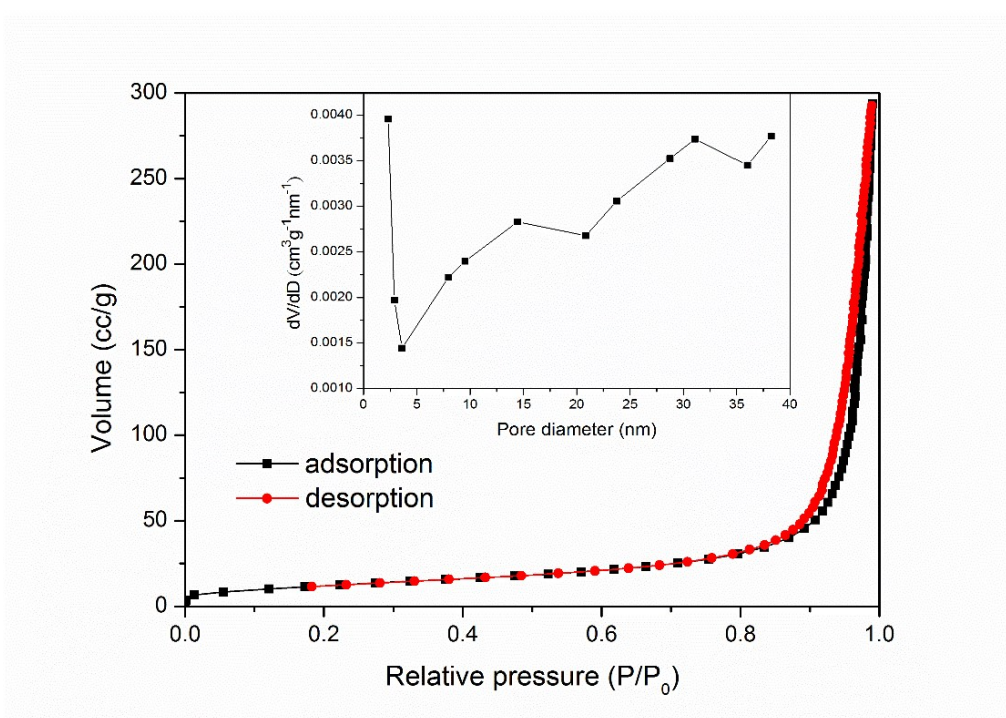

Fig. S3 Nitrogen adsorption-desorption isotherms of  $\text{BiOI}_{0.5}\text{Cl}_{0.5}$ .

**Fig. S4**

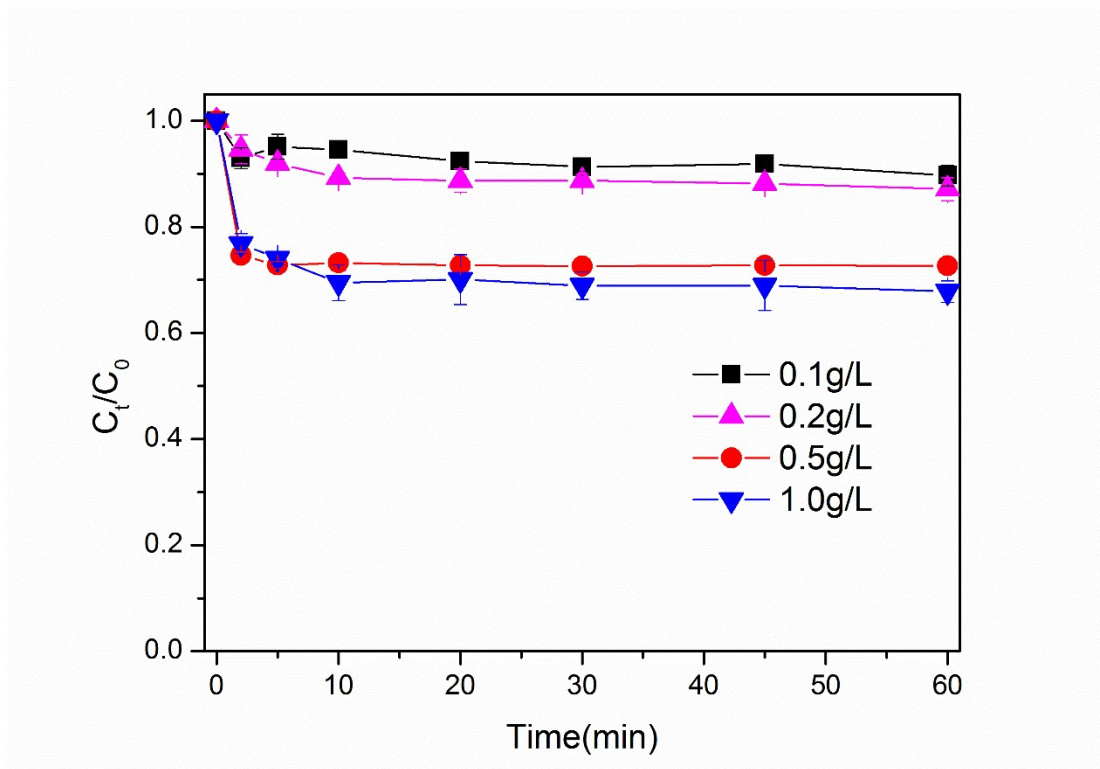

**Fig. S4** The adsorption efficiencies of BPAF by varying the  $\text{BiOI}_{0.5}\text{Cl}_{0.5}$  dosage ( $[\text{BPAF}] = 10 \text{ mg/L}$ ,  $\text{BiOI}_{0.5}\text{Cl}_{0.5}$  dosage = 0.1-1.0 g/L,  $T = 298\text{K}$ ).

Fig. S5

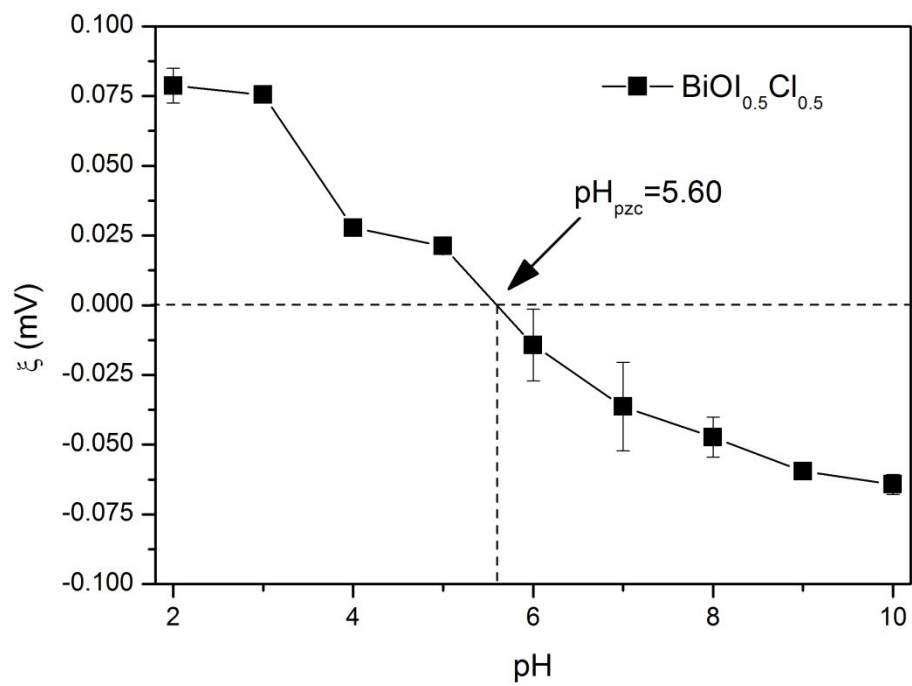

Fig. S5 Zeta potential versus pH for the as-prepared  $\text{BiOI}_{0.5}\text{Cl}_{0.5}$

Fig. S6

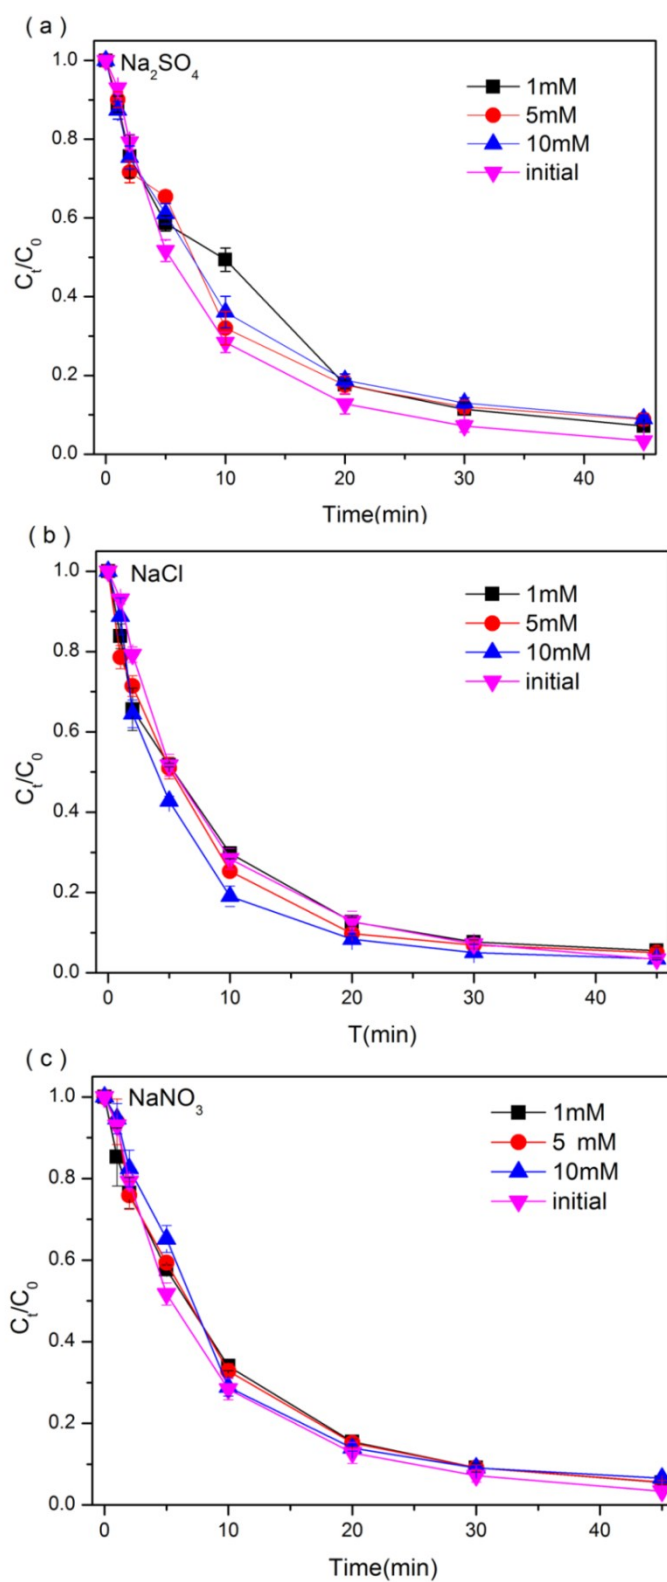

**Fig. S6** Effect of initial solution (a) sulfate ion concentration, (b) chloride ion concentration and (c) nitrate ion concentration on BPAF removal efficiency ([BPAF] =10mg/L,  $\text{BiOI}_{0.5}\text{Cl}_{0.5}$  dosage=0.5g/L, PMS/BPAF=5, [ions] =0-10Mm, T=298K).

**Fig. S7**

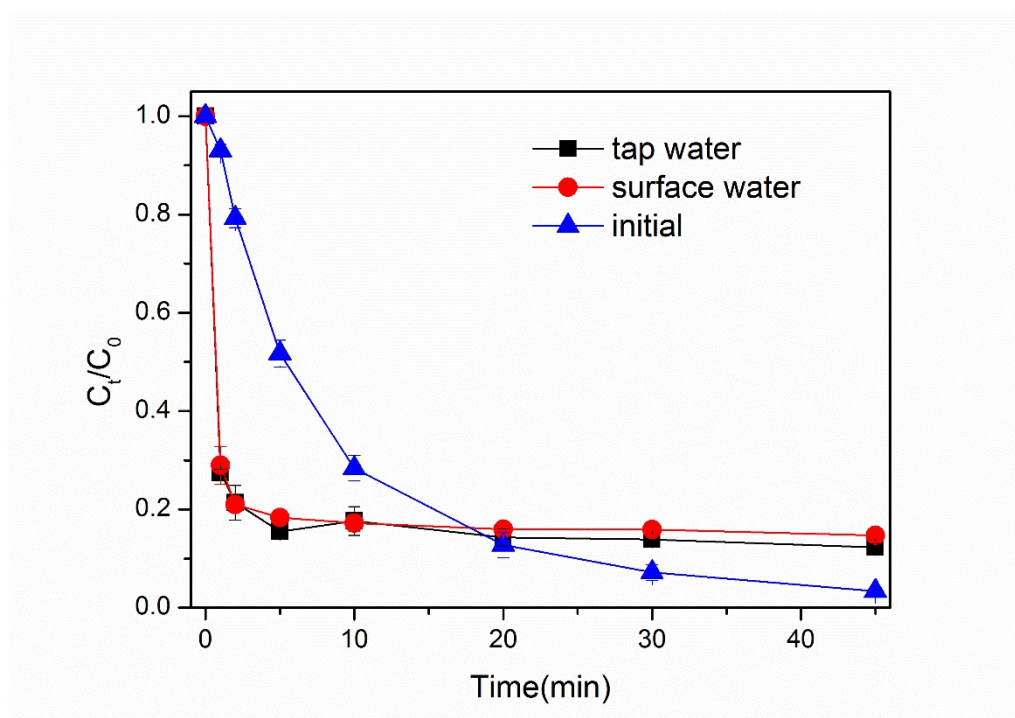

**Fig. S7** Effect of different water matrices ( $[BPAF] = 10\text{mg/L}$ ,  $\text{BiOI}_{0.5}\text{Cl}_{0.5}$  dosage =  $0.5\text{g/L}$ ,  $\text{PMS/BPAF} = 5$ ,  $T = 298\text{K}$ ).



**Fig. S8**

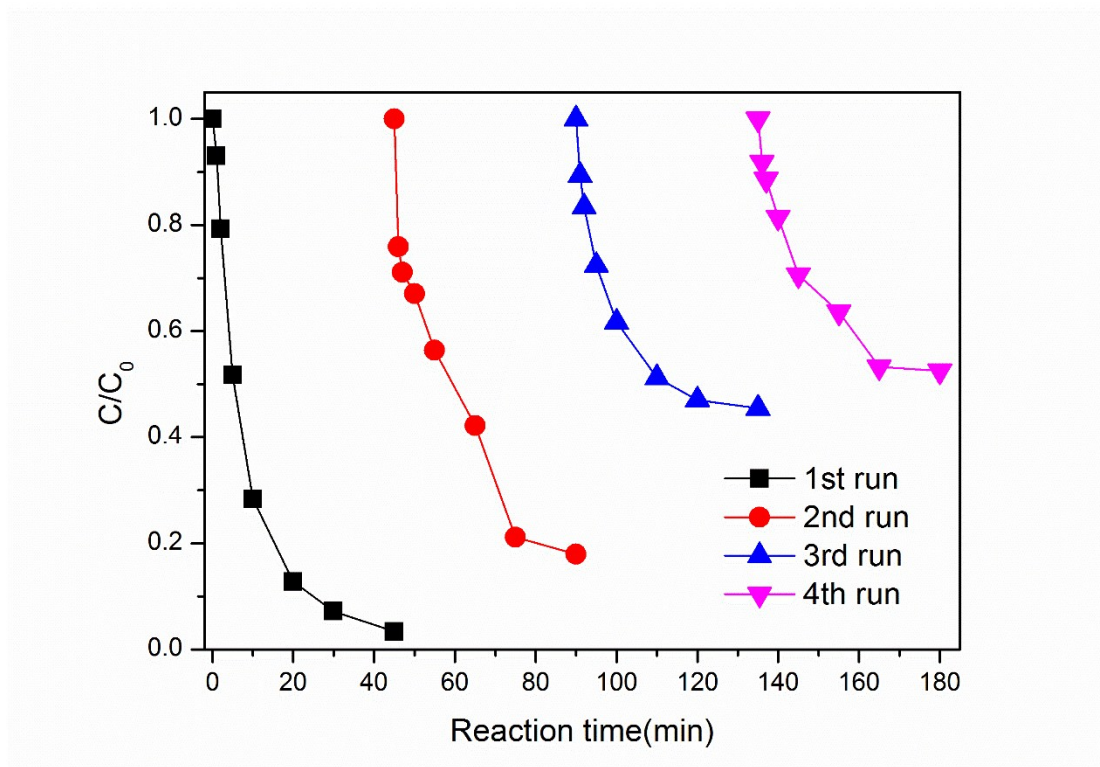

**Fig. S8** The reusability of the BiOI<sub>0.5</sub>Cl<sub>0.5</sub> samples to degrade BPAF ([BPAF] =10mg/L, BiOI<sub>0.5</sub>Cl<sub>0.5</sub> dosage=0.5g/L, PMS/BPAF=5, T=298K).

**Fig. S9**

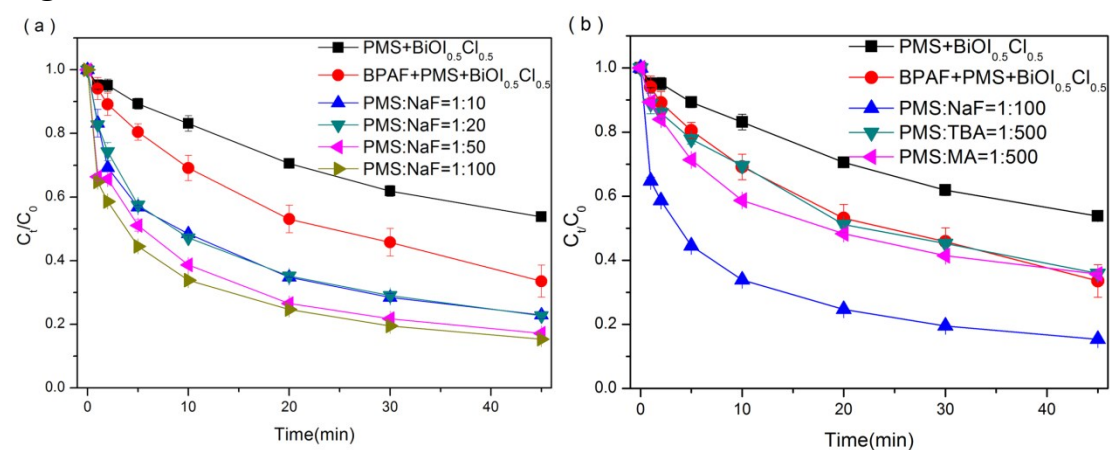

**Fig. S9** (a)The degradation of the PMS in different systems and (b)in the presence of NaF , TBA and methanol as radical scavengers ([BPAF] =10mg/L, BiOI<sub>0.5</sub>Cl<sub>0.5</sub> dosage=0.5g/L, PMS/BPAF=5, [methanol] = [TBA] =0.075mol/L, [NaF] = 0-0.015mol/L, T=298K).
